# Supplementary material
Source: PubMed Central journal article supplement (PMC3374356)
Supplement: 97320630008461S1.pdf [file 97320630008461S1.pdf]

## Supplementary material:

**Table 1:** Details of the primers used in this study

| Primer Pair     | Annealing temp in C | Primer Sequence                                                     | Expected Amplicon Length | Ref                    |
|-----------------|---------------------|---------------------------------------------------------------------|--------------------------|------------------------|
| <i>AtxA</i>     | 50                  | 5'-GACATGCTAACACCGATATCC-3',<br>5'-TGCATTACCCGTTCTTCC-3'            | 1500 bp                  | [4]                    |
| <i>cap A</i>    | 50                  | 5'GTGCTTTTAACCGCTTGTGGTAATAC-3'<br>5'TAGTCTTTATACCAATTTCCCAACAC-3'  | 1178 bp                  | Designed in this study |
| <i>cyt1gral</i> | 52                  | 5' CCTCAATCAACAGCAAGGGTATT -3'<br>5'TGCCAAACAGGACATTGTATGIGTAATT-3' | 450 bp                   | [18]                   |
| <i>cyt2gral</i> | 50                  | 5' ATTACAAATGCAAAATGGTATTCC<br>5'TTTCAACATCCACAGTAATTTCAAATGC       | 350 bp                   | [18]                   |
| <i>ps1</i>      | 48                  | 5'-ATCAAGAATTTTCCGATAATC-3'<br>5'-CCAAAGTGCCAGAAATG-3'              | 1000 bp                  | [19]                   |
| <i>ps-4</i>     | 48                  | 5'-TTTTGCAAAGGTAGGT-3'<br>5'-AAATAGGAATATCTAATC-3'                  | 471 bp                   | [20]                   |
| <i>ps-6</i>     | 48                  | 5' GGATCTGTACCGCAATTCA-3'<br>5' TGGGATTGATGGGATTAATGT-3,            | 1000 bp                  | [21]                   |

**Table 2: Morphological and Biochemical characteristics**

| Sl.No        | Name of the parameter                     | Observations       |
|--------------|-------------------------------------------|--------------------|
| 1            | Gram Staining                             | Positive           |
| 2            | Spore staining                            | Positive           |
| 3            | Cell shape                                | Long rod           |
| 4            | Density                                   | Opaque             |
| 5            | Elevation                                 | Convex             |
| 6            | Margin                                    | Irregular          |
| 7            | Configuration                             | Entire             |
| 8            | Pigmentation                              | Nil                |
| 9            | H <sub>2</sub> S production               | Negative           |
| 10           | Fluorescence                              | Negative           |
| 11           | Motility                                  | Positive           |
| 12           | Haemolytic activity                       | Negative           |
| 13           | Catalase                                  | Positive           |
| 14           | Methyl Red                                | Positive           |
| 15           | Voges Proskauer                           | Positive           |
| 16           | Indole                                    | Positive           |
| 17           | Citrate utilization                       | Positive           |
| 18           | Starch utilization                        | Positive           |
| 19           | Caesin                                    | Positive           |
| 20           | Gelatin                                   | Negative           |
| 21           | Oxidation Fermentation                    | Positive           |
| 22           | Nitrate reduction                         | Positive           |
| 23           | Anaerobic growth                          | Negative           |
|              | <b>Acid production from carbohydrates</b> |                    |
|              | Glucose                                   | Positive           |
|              | Fructose                                  | Positive           |
|              | Arabinose                                 | Negative           |
|              | D-xylose,                                 | Negative           |
| 24           | D-mannitol,                               | Negative           |
|              | Lactose,                                  | Negative           |
|              | Maltose                                   | Positive           |
|              | Mannitol                                  | Negative           |
|              | Sucrose                                   | Mild               |
|              | Galactose                                 | Negative           |
| <b>Sl No</b> | <b>Growth parameter</b>                   | <b>Observation</b> |
|              | Growth on NaCl                            |                    |
|              | 5%                                        | Positive           |
| 1            | 7%                                        | Positive           |
|              | 10%                                       | Positive           |
|              | 12%                                       | Weak               |
|              | <b>Temperature</b>                        |                    |
|              | Growth at 4 <sup>o</sup> C                | Negative           |
|              | Growth at 15 <sup>o</sup> C               | Negative           |
| 2            | Growth at 25 <sup>o</sup> C               | Positive           |
|              | Growth at 37 <sup>o</sup> C               | Positive           |
|              | Growth at 42 <sup>o</sup> C               | Weak               |
|              | Growth at 50 <sup>o</sup> C               | Negative           |

**Table 3: Antibiotic sensitivity test on *B.t.LDC-391***

| Antibiotics tested | Concentration per disc | Zone of clearance | Remarks      |
|--------------------|------------------------|-------------------|--------------|
| Ampicillin         | 10µg                   | 0mm               | Resistant    |
| Bacitracin         | 10µg                   | 0mm               | Resistant    |
| Amoxicillin        | 50µg                   | 0mm               | Resistant    |
| Penicillin         | 20 U                   | 0mm               | Resistant    |
| Polymyxin B        | 300 U                  | 0mm               | Resistant    |
| Rifampicin         | 5 µg                   | 5 mm              | Intermediate |
| Streptomycin       | 10µg                   | 8 mm              | Sensitive    |
| Tetracyclin        | 30µg                   | 10 mm             | Sensitive    |
| Chloramphenicol    | 30µg                   | 13 mm             | Sensitive    |
| Kanamycin          | 10µg                   | 12 mm             | Sensitive    |
| Azithromycin       | 10µg                   | 15 mm             | Sensitive    |

(0 mm clearance: Resistant; 0-5 mm clearance: Intermediate; >5 mm clearance: Sensitive).
